1 **Title:** Systematic determination of in vitro phenotypic resistance to HIV-1 integrase strand  
2 transfer inhibitors from clinical samples

3 **Authors:**

4 Aniqah SHAHID [1]

5 Wendy W. ZHANG [2]

6 Vincent MONTOYA [1]

7 Peter K. CHEUNG [1]

8 Natalia OLIVEIRA [1]

9 Manraj S. SIDHU [1] \*

10 Conan K. WOODS [1]

11 Marjorie A. ROBBINS [1] #

12 Chanson J. BRUMME [1]

13 P. Richard HARRIGAN [2]

14 **Affiliations:**

15 1. British Columbia Centre for Excellence in HIV/AIDS, Vancouver, BC, Canada, V6Z 1Y6

16 2. University of British Columbia, Vancouver, BC, Canada, V6T 1Z2

17 **Current affiliations:**

18 \* Western College of Veterinary Medicine, University of Saskatchewan, 52 Campus Drive,

19 Saskatoon, SK S7N 5B4, Canada

20 # City of Hope, Los Angeles, CA, USA, 91010

21 **Running head:** HIV-1 integrase drug resistance

22 **Corresponding author:** P. Richard Harrigan,

23 Division of AIDS, Department of Medicine, University of British Columbia, Vancouver, BC,

24 Canada, V6T 1Z2, Telephone: (+1) 604-788-0998, e-mail: richard.harrigan@ubc.ca

25 Word count abstract: 237

26 Word count text: 3281

27

28

29

30

31

32

33

34

35

36

37

38

39

40

41

42

43

44

45

46 **ABSTRACT**

47 Phenotypic resistance data is relatively sparse for the newest HIV-1 integrase strand transfer  
48 inhibitors (INSTIs), dolutegravir (DTG), bictegravir (BIC), and cabotegravir (CAB). In this  
49 study, we report the phenotypic susceptibility of a large panel of oligo-clonal patient-derived  
50 HIV-1 integrase viruses. Representative clinical samples (N=141) were selected from a large  
51 database (N=17,197) of clinically-derived HIV integrase sequences, based on the presence of  
52 permutations of substitutions at 27 pre-defined positions in integrase (N=288). HIV-1 RNA was  
53 extracted from patient samples and diluted to approximately 500 HIV RNA copies/mL. Using an  
54 “oligo-clonal” amplification approach to achieve single-copy amplification, these dilutions were  
55 subjected to 12 parallel RT-PCR reactions to amplify integrase. Confirmed clonal amplicons  
56 were co-transfected with linearized pNL4.3Δint into CEM-GXR cells. In total, 162 HIV-1  
57 viruses that carried no mixtures and had a unique sequence were harvested, and phenotyped in  
58 MT4-LTR-EGFP cells subsequently. Variants with the highest fold change (FC) had G140S and  
59 Q148R/H and resistant to all five drugs; R263K was the only single variant conferring >3-FC to  
60 DTG, BIC and CAB. There was extensive cross-resistance between DTG, BIC, and CAB and  
61 phenotypic resistance values for all the three INSTIs were almost collinear. The greatest  
62 exceptions were variants with N155H/G163E or L74I/T97M/F121C/V151I/E157Q/G163K,  
63 where both had >70-FC for CAB, while <3-FC for DTG and BIC. While site-directed  
64 mutagenesis is invaluable; the systematic selection of representative mutational patterns  
65 observed *in vivo* provides an efficient way to identify clinically relevant drug resistance.

66

67 **Key words:** bictegravir, dolutegravir, cabotegravir, drug resistance, phenotyping

68

## 69 **BACKGROUND**

70 The success of combination antiretroviral therapy (cART) has remarkably reduced HIV/AIDS-  
71 related morbidity and mortality [1]. However, the emergence of antiretroviral (ARV) drug  
72 resistance can compromise global HIV/AIDS treatment and prevention strategies [2, 3]. With the  
73 increasing use of ARV drugs, HIV drug resistance (HIVDR) surveillance is warranted. Among  
74 other ARV drugs, integrase strand transfer inhibitors (INSTIs) are increasingly prescribed  
75 because of their tolerability and efficacy [4-6]. In particular, raltegravir (RAL), elvitegravir  
76 (EVG), dolutegravir (DTG), and bictegravir (BIC), are currently in clinical use [7], with  
77 cabotegravir (CAB) in advanced clinical development [8]. However, similar to other ARV drugs,  
78 emerging INSTI resistance may become a barrier to HIV disease management [9].

79 HIV drug resistance can be inferred via automated sequence-based genotyping, with  
80 interpretations of nucleic acids driven at least in part, by genotype-phenotype correlations.  
81 Genotyping is usually preferred over quantitative phenotyping for routine clinical testing because  
82 of lower costs, faster turn-around time, and greater accessibility [10]. However, phenotyping can  
83 provide insight required for adequate understanding of ARV drug resistance. Most importantly, it  
84 has been challenging to understand INSTI resistance because: a) phenotypic resistance data is  
85 relatively sparse for INSTIs; b) there are low reported failure rates of patients on INSTIs; c) *in*  
86 *vitro* drug resistance selection has been slow or unsuccessful [11]; and d) multiple mutations may  
87 be required to confer resistance [12].

88 While *in vitro* INSTI drug selection experiments, typically starting from clonal HIV  
89 subtype B isolates, have been instrumental in providing detailed insights to the emergence of  
90 novel HIVDR mutations [13]; these cannot represent the majority of virus sequence diversity  
91 observed *in vivo*. In order to capture the breadth of the naturally occurring viral variation in

92 INSTI-naïve and experienced populations, it is essential to generate patient-derived integrase  
93 isolates and perform *in vitro* phenotyping. Therefore, in this study, we performed a relatively  
94 large-scale phenotypic analysis of HIV drug resistance in clinically-derived isolates, focusing on  
95 all five INSTIs to maximize coverage of *in vivo* sequence variation.

## 96 MATERIALS AND METHODS

### 97 *Research ethics approval*

98 The University of British Columbia Providence Health Care Research Ethics Board  
99 approved this research study (protocol H14-03423).

### 100 *Selection of clinical samples*

101 The materials and methods employed in this study were previously reported [12]. The  
102 British Columbia Centre for Excellence in HIV/AIDS (BCCfE) routinely conducts clinical HIV  
103 genotypic drug resistance testing on total nucleic acid extracts (RNA/DNA) derived from patient  
104 plasma samples, and the DNA sequence data is regularly uploaded to the BCCfE's secure Oracle  
105 database. For the purposes of this study, clinical samples with integrase genotypic resistance  
106 tests and their DNA sequences were identified from the BCCfE database (N= 17,197). A total of  
107 27 amino acid positions in integrase were identified as having amino acids that differed in  
108 prevalence between INSTI-treated (primarily RAL and/or EVG) and naïve individuals,  
109 (<https://hivdb.stanford.edu/cgi-bin/MutPrevBySubtypeRx.cgi>) at the time of study design. Of the  
110 27 amino acid positions, (51, 66, 68, 74, 92, 95, 97, 114, 118, 121, 128,138, 140, 143, 145, 146,  
111 147, 148, 151, 153, 155, 157, 163, 230 and 263), 25 have been previously reported and are part  
112 of the Standard HIVdb ver. 8.4 interpretive algorithm for integrase (Supplemental Figure 1) [14,  
113 15]. By comparing the odds (the frequency of mutation in INSTI-experienced individuals  
114 divided by the frequency of mutation in INSTI-naïve individuals) of mutations occurring at the  
115 positions along the integrase, positions 79 and 232 were identified as positions having high odds  
116 of mutations occurring in INSTI-experienced patients.

117

118           Having identified 27 codon positions, we next sought to identify clinical isolates  
119 harboring permutations of one or more of these substitutions *in vivo*. Clinical samples with  
120 mixtures at any of the 27 amino acids were excluded from further analysis and remaining 12,109  
121 samples were categorized based on their 27 amino acid permutations. In total, 288 unique  
122 permutations of substitutions at the 27 codons were identified. For each permutation, one to three  
123 samples were selected for further processing, leading to a total of N=141 tested samples focusing  
124 on the most commonly occurring permutations which existed *in vivo*.

### 125 ***Cell lines and reagents***

126           CEM-GXR cells and HIV-1 NL4.3 plasmid with integrase gene deleted (pNL4.3 $\Delta$ int)  
127 were generously provided by Dr. Mark Brockman (Simon Fraser University, Burnaby, Canada)  
128 [16]. Dr. Theresa Pattery (Janssen Diagnostics, Beerse, Belgium) kindly provided MT4-LTR-  
129 EGFP cells. The integrase inhibitors, RAL, EVG, DTG, and CAB were purchased from Selleck  
130 Chemicals (Houston, USA). Bictegravir was synthesized by the Centre for Organic Synthesis,  
131 University of British Columbia (Vancouver, Canada).

### 132 ***Oligo-clonal amplification and sequencing***

133           Total nucleic acids were extracted from 500 $\mu$ L of plasma using the NucliSens easyMAG  
134 Extractor (bioMérieux, Saint-Laurent, Canada). For most samples tested, HIV RNA from routine  
135 clinical genotyping was stored at -80°C. If RNA was not available after routine clinical  
136 genotyping, a fresh extraction was performed. Oligo-clonal amplification was performed on total  
137 nucleic acid extracts by diluting them in diethyl pyrocarbonate (DEPC)-treated water to  
138 approximately 250-500 HIV RNA copies/mL to achieve single-copy amplification. Diluted  
139 extracts were amplified in 12 parallel reactions using the Transcriptor One-step RT-PCR kit  
140 (Roche, Basel, Switzerland) for reverse-transcription and first-round PCR. A second round of

141 PCR amplification was performed on each reaction using integrase-specific primers, generating  
142 an amplicon that covered 1-288 amino acids of integrase [12]. PCR amplicons were sequenced  
143 on an ABI 3730xl sequencer (Thermo Fisher Scientific, Waltham, USA) and analyzed using the  
144 in-house base-calling software ReCall (University of British Columbia, Vancouver, Canada)  
145 [17]. These conditions led to about a 50% success rate for PCR amplifications; assuming a  
146 Poisson distribution, most amplifications would have originated from 0, 1 or 2 original starting  
147 templates. Amplicons that contained no inferred amino acid mixtures at 27 codons associated  
148 with HIV INSTI exposure upon sequence analysis were chosen for recombinant virus production  
149 in order to have relatively direct genotype-phenotype correlations.

#### 150 ***Recombinant virus production***

151 Linearized pNL4.3 $\Delta$ int was generated using BstEII restriction digestion as previously  
152 described [16]. Recombinant viruses were generated by co-transfecting linearized pNL4.3 $\Delta$ int  
153 with the corresponding second round PCR product into CEM-GXR cells, via electroporation  
154 using a Bio-Rad GenePulser II. Transfected cells were transferred into tissue culture flasks with  
155 5 mL of room temperature Roswell Park Memorial Institute (RPMI) culture medium  
156 supplemented with 20% fetal bovine serum (R20+) and incubated at 37 °C in a humidified 5%  
157 CO<sub>2</sub> atmosphere. After co-transfection, 2 mL of fresh R20+ was added every two to three days  
158 until the total volume of each tissue culture flask reached 10 mL. After which, 2 mL of  
159 supernatant was removed and replenished with fresh R20+ media until harvest. Green  
160 fluorescent protein (GFP) expression was monitored by flow cytometry (FACSCalibur Guava  
161 8HT [Millipore]) starting on day 12, as previously described [16]. Once the infection (GFP-  
162 positive cells) reached 15-30%, viruses were harvested and stored at -80°C until use. HIV-1  
163 RNA was extracted from the harvested viruses and subjected to nested RT-PCR and Sanger



164 sequencing of integrase, as described previously [12, 17]. The harvested recombinant virus  
165 sequences were confirmed to be identical to the amplicon sequences at 27 codon positions.  
166 Recombinant viruses with a unique permutation of amino acids at the 27 positions of interest  
167 were assayed for phenotypic drug resistance. For viruses, which were identical at the 27  
168 positions of interest, only a single virus (chosen arbitrarily) was assayed.

### 169 *Phenotypic drug susceptibility assays*

170 Recombinant virus titres were determined by infecting MT4-LTR-EGFP cells in a three-  
171 day assay and infectivity data collected using a SpectraMax i3 Minimax 300 microplate reader  
172 and cytometer (Molecular Devices, San Jose, USA). The SpectraMax captures images of each  
173 individual well of a 96-well plate and counts the number of infected (GFP-positive cells) and  
174 non-infected (GFP-negative) cells. Titered volumes of recombinant viruses (such that 15% - 30%  
175 infection is reached on the third or fourth day post-infection) and MT4-LTR-EGFP cells were  
176 plated in triplicate with eight concentrations ranging from no drug to 1000nM (10-fold dilutions  
177 from 0.1nM to 1000nM with 3nM and 45nM included) of BIC, CAB, DTG, RAL, and EVG.  
178 Viral infectivity data was measured using the SpectraMax microplate reader

### 179 *Data analysis and graphing*

180 Graphs and statistical analysis were done in R (version 3.2.3). The 50% effective  
181 concentrations (EC50s) were calculated by fitting to a four parameter EC50 model using in-  
182 house scripts written in R using the nplr package version 0.1-7. Fold changes (FC) in EC50 of  
183 the virus relative to a NL4.3 control virus were calculated using mean EC50s (performed in  
184 triplicate). Fold change values were log transformed and presented as log-FC.

185

186 **RESULTS**

187 *Systematic determination of amino acid permutations to test in vitro*

188 To maximize the efficiency of HIV integrase phenotyping, we implemented a systematic  
189 approach to identify clinical samples capturing the most commonly occurring amino acid  
190 permutations at 27 positions in integrase associated with INSTI exposure *in vivo*. A total of 288  
191 amino acid permutations at these positions were observed in our large clinical database  
192 (Supplemental Table 1). To maximize the direct relationship between genotype and phenotype  
193 correlations, these samples were further diluted and amplified in 12 parallel RT-PCR reactions to  
194 generate near clonal DNA sequences (see Methods) to minimize confounding by “mixtures”.  
195 The overall PCR amplification rate that led to a successful amplification of the integrase gene  
196 with no mixtures at the 27 inferred amino acid positions averaged approximately 41%  
197 (1644/3985 amplicons, including repeated tests). A total of 162 recombinant viruses were  
198 generated and phenotyped. Of note here, all recombinant viruses (N=162) were phenotyped for  
199 DTG, BIC and CAB. However, a subset of these (N=84) were phenotyped for RAL and EVG  
200 (Supplemental Table 3). These viruses represent 90% of the observed sequence variation among  
201 the clinical samples at the 27 relevant integrase codon positions. The results from the 141 clinical  
202 samples representing six HIV-1 subtypes (B=101, C=16, A=9, G=3, D=2, F=1) and 3 circulating  
203 recombinant forms (CRF02\_AG=4, CRF01\_AE=4, CRF03\_AB=1) from the BCCfE database  
204 are presented in this study (Supplemental Tables 2 and 3), indicating both the complete amino  
205 acid sequence and the most relevant 27 codon positions. At the 27 codons, the viruses (N=162)  
206 carried up to 50 amino acid substitutions relative to reference HIV subtype B consensus  
207 sequence (Figure 1).

208

209 ***Differential selection of resistance to INSTIs***

210 We assayed 162 recombinant viruses for phenotypic susceptibility to five INSTIs; raltegravir,  
211 elvitegravir, dolutegravir, bictegravir and cabotegravir. All amino acid substitution combinations  
212 and their observed FC values for the five INSTIs are listed in Supplemental Table 3.

213 We observed a wider log-FC shift for subtype B compared to non-B viruses (Figure 2). Among  
214 single variants, R263K was the only single variant conferring >3-FC for all DTG, BIC and CAB  
215 (3.9, 3.2 and 4-fold, respectively). The single mutants N155H, E157Q and Y143R had >3-FC for  
216 RAL and EVG. Among the double mutants observed, T66I/G118R had >3-FC for DTG, BIC and  
217 CAB. G140S/Q148R showed consistently >3-FC for all five drugs. N155H/G163E had >3-FC  
218 for CAB (and RAL and EVG) but was susceptible to DTG and BIC. R263K/G163E had  
219 consistently higher FC (>3-FC) as a double mutant as well. E138K/Q148R had >10 and >200-FC  
220 for RAL and EVG, respectively. Among triple mutants observed, E138A/G140S/Q148H showed  
221 >5-FC for CAB, however it was susceptible to BIC and DTG (2 and 2.8-FC, respectively). As  
222 shown previously [12], eight viruses carried G140S/Q148H only, two had the combination  
223 G140S/Q148H + T97A and 3 viruses had G140S/Q148H + T97A + L74M. Viruses with  
224 G140S/Q148H were highly resistant to RAL and EVG with >100-FC but had relatively small  
225 changes in susceptibility to DTG, BIC and CAB (median 2.9 to 4.7 FC). Viruses with an  
226 additional T97A substitution or additional T97A + L74M substitutions maintained high FC to  
227 RAL and EVG (>100-FC) but were increasingly resistant to DTG, BIC, and CAB [12]. Among  
228 quadruple mutants, V79I/E138K/G140A/Q148R had >10-FC for DTG, BIC and CAB. A virus  
229 carrying six amino acid substitutions (L74I/V79I/G140A/Q148R/V151I/E157Q) showed high  
230 FC to DTG, BIC and CAB (>500-FC). One additional virus carrying six amino acid substitutions  
231 (L74I/T97M/F121C/V151I/E157Q/G163K) showed >50-FC for CAB, however it was

232 susceptible to DTG and BIC. The greatest exceptions were variants with N155H/G163E or  
233 L74I/T97M/F121C/V151I/E157Q/G163K, where both had >75-FC for CAB, while <3-FC for  
234 DTG and BIC (Figure 3).

235 ***Extensive cross-resistance between DTG, BIC and CAB***

236 Spearman rank correlation coefficients of log-FC values between DTG and BIC or CAB were  
237 strongly correlated, with BIC and CAB with correlation coefficients of 0.93 (slope 0.81) and  
238 0.87 (slope 1.1), respectively (Figure 4A, 4B). DTG resistance, for select viruses where log-FC  
239 values were calculated for RAL and EVG, was modestly correlated with RAL and EVG  
240 resistance (data not shown), at least in part because RAL and EVG FC values exceeded what  
241 could be measured in our assay (>1000-fold).

## 242 **DISCUSSION**

243           The second-generation INSTIs, DTG and BIC have a higher genetic barrier to resistance  
244 in comparison to first-generation INSTIs (RAL and EVG), resulting in low rates of resistance  
245 development *in vivo* or *in vitro*. This desirable property has had the side-effect that the  
246 identification of drug resistance (especially by routine integrase sequencing methods) is difficult  
247 for second-generation INSTIs. However, this pressure may force HIV to evolve along novel and  
248 unidentified mutational pathways *in vivo*, including at sites outside the HIV *pol* gene [18].  
249 Systematically screening large panels of clinically-derived isolates from patients offers insights  
250 into resistance phenotypes conferred by integrase variation and can inform genotypic resistance  
251 interpretation algorithms, such as the Stanford HIVdb [15].

252           The rationale behind our systematic screening strategy is worth the discussion here: 1)  
253 INSTI treatment failure reports are rare, especially for second-generation INSTIs [19]; 2) testing  
254 FC *in vitro* for all possible variations in integrase is an intractable problem; 3) in reality, only  
255 those mutations associated with INSTI Failure (or just INSTI exposure) require testing, as much  
256 of the other variation in integrase will not result in resistance - we therefore identified 27 codon  
257 positions that were associated with INSTI exposure by identifying mutations with greater  
258 prevalence in INSTI-treated patients in our database, as well as the data available in public  
259 domains (such as Stanford HIVdb); 4) in addition, integrase resistance may be the result of the  
260 accumulation of multiple resistance mutations *in vivo*, it is necessary to test  
261 combinations/permutations of mutations at these 27 codon positions; since this is impossible,  
262 even for 27 codon positions, we reduced this further by only testing permutations/combinations  
263 that were observed *in vivo*.

264           Theoretically, the numbers of mathematically possible permutations of the integrase,  
265 even considering only the 27 codons here vastly exceeds the number of permutations that were  
266 observed *in vivo* (N=288) from our database of >15,000 clinically-derived integrase sequences.  
267 In this way, relatively few samples can represent much of the observed *in vivo* variation  
268 (Supplemental Figure 2).

269           This is one of the first studies to report *in vitro* phenotypic susceptibility of a large panel  
270 of HIV-1 integrase recombinant viruses for DTG, BIC and CAB, derived directly from clinical  
271 samples where patients were primarily either integrase-naïve or exposed to first-generation  
272 INSTIs. Upon comparing our panel of viruses with published data (available on Stanford HIVdb  
273 (<https://hivdb.stanford.edu/pages/phenoSummary/Pheno.INI.Simple.html>), we observed that very  
274 few clinically-derived isolates resistant to DTG were reported previously. For DTG, 18 clinical  
275 variants have been reported to carry G140S/Q148H with 3 to 15-FC. Addition of T97A  
276 (G140S/Q148H/T97A) increased the resistance to >50-FC. This is broadly similar to what we  
277 have observed. However, there have been no reports on variants carrying  
278 L74M/T97A/G140S/Q148H. Moreover, there is no data on BIC and CAB other than our report  
279 here and some recent conference proceedings [20-22].

280           In addition, two variants containing G140S/Q148R showed modest FC values for DTG (4  
281 and 6.2) [23, 24]. This is similar to our reported FC values of 3.7 and 4.9. There have been  
282 reports on laboratory-adapted strains that carry Q148R/N155H with DTG FC of about 5, but we  
283 have not observed a N155H mutation co-exist with a 148R in over 15,000 clinical isolates. Most  
284 commonly, N155H and Q148K exist in combination with G140S in our database. This suggests  
285 the difficulty of creating laboratory generated strains using site-directed mutagenesis that  
286 accurately represent the *in vivo* sequence observed in clinically-derived samples. In addition, we

287 have not yet observed a variant carrying E138K/S147G/N155H/T97A/V151I, previously  
288 reported to be highly resistant to DTG (>50-FC) [25].

289 Consistent with previous reports, we observed that for the first-generation INSTIs RAL  
290 and EVG, higher log-FC values (exceeding limits of our analysis) for viruses carrying G140S  
291 and Q148H. However, these viruses were still susceptible to second-generation INSTIs DTG,  
292 BIC and an investigational drug, CAB. The addition of one or more substitutions (T97A and  
293 L74M) conferred greater resistance to DTG, BIC and CAB. Results were concordant with  
294 previously published data and confirmed extensive cross-resistance between DTG, BIC and CAB  
295 [12].

296 Some limitations of the study merit mention here. First, this study reflects populations  
297 either primarily exposed to RAL/EVG, or with no known prior exposure to INSTIs and as such,  
298 the >15,000 sequences considered here does not capture all sequence variation likely to be  
299 observed in patients failing second-line INSTI. Second, our focus on 27 amino acid substitutions  
300 only within the integrase gene may omit the contributions of other substitutions inside the  
301 integrase gene in conferring resistance, so we cannot make causal conclusions between the  
302 observed phenotypes and genotypes. Moreover, we have not looked at amino acid substitutions  
303 outside integrase which may confer low, medium and/or high-level resistance to the current  
304 INSTIs [18]. Third, we have not demonstrated any relevant cut-offs for inferring clinically  
305 relevant resistance and impact on virological outcomes. We recognize that the accurate  
306 interpretation of genotypic drug resistance data requires correlations with phenotypic data (*i.e.*  
307 genotype:phenotype relationships) as well as with clinical data on virological outcomes after  
308 therapy [26, 27].

309 In conclusion, naturally occurring amino acid variants emerging during ART provide  
310 insights into viral escape and resistance. Selection of patient-derived clonal viruses based on  
311 large genotype databases to make the observed sequence variation *in vivo* can be used to  
312 efficiently generate panels of resistant viruses for phenotype analysis. If new mutations or  
313 permutations are identified it is straightforward to select these for future phenotyping and  
314 identify new patterns leading to decreased susceptibility to the newest INSTIs. It will be essential  
315 to monitor HIV variation inside and outside the integrase gene in those patients who have failed  
316 DTG and/or BIC, particularly in those with non-B subtypes of HIV.

### 317 **Notes**

#### 318 *Acknowledgement*

319 We acknowledge Sarina Barnes and Rob Hollebakken for technical assistance with PCR and  
320 sequencing. We thank Kimia Kamelian for critically reading the manuscript and providing a  
321 valuable feedback.

#### 322 *Financial support*

323 Funding from Genome Canada, Genome BC and CIHR via the large-scale HIV142 project was  
324 provided to PRH to fund this work.

#### 325 *Potential conflicts of interest*

326 P. R. Harrigan has previously received grants from Merck.

327

328

329



## 330 REFERENCES

- 331 1. Ford, N., et al., *The WHO public health approach to HIV treatment and care: looking*  
332 *back and looking ahead*. *Lancet Infect Dis*, 2018. **18**(3): p. e76-e86.
- 333 2. Gupta, R.K., et al., *HIV-1 drug resistance before initiation or re-initiation of first-line*  
334 *antiretroviral therapy in low-income and middle-income countries: a systematic review*  
335 *and meta-regression analysis*. *Lancet Infect Dis*, 2018. **18**(3): p. 346-355.
- 336 3. Hamers, R.L., T.F. Rinke de Wit, and C.B. Holmes, *HIV drug resistance in low-income*  
337 *and middle-income countries*. *Lancet HIV*, 2018. **5**(10): p. e588-e596.
- 338 4. Meintjes, G., et al., *Adult antiretroviral therapy guidelines 2017*. *South Afr J HIV Med*,  
339 2017. **18**(1): p. 776.
- 340 5. Mills, A., et al., *Patient-Reported Symptoms Over 48 Weeks in a Randomized, Open-*  
341 *Label, Phase IIIb Non-Inferiority Trial of Adults with HIV Switching to Co-Formulated*  
342 *Elvitegravir, Cobicistat, Emtricitabine, and Tenofovir DF versus Continuation of Non-*  
343 *Nucleoside Reverse Transcriptase Inhibitor with Emtricitabine and Tenofovir DF.*  
344 *Patient*, 2015. **8**(4): p. 359-71.
- 345 6. Sax, P.E., et al., *Co-formulated elvitegravir, cobicistat, emtricitabine, and tenofovir*  
346 *versus co-formulated efavirenz, emtricitabine, and tenofovir for initial treatment of HIV-1*  
347 *infection: a randomised, double-blind, phase 3 trial, analysis of results after 48 weeks.*  
348 *Lancet*, 2012. **379**(9835): p. 2439-2448.
- 349 7. Dorward, J., et al., *Dolutegravir for first-line antiretroviral therapy in low-income and*  
350 *middle-income countries: uncertainties and opportunities for implementation and*  
351 *research*. *Lancet HIV*, 2018. **5**(7): p. e400-e404.
- 352 8. Margolis, D.A., et al., *Long-acting intramuscular cabotegravir and rilpivirine in adults*  
353 *with HIV-1 infection (LATTE-2): 96-week results of a randomised, open-label, phase 2b,*  
354 *non-inferiority trial*. *Lancet*, 2017. **390**(10101): p. 1499-1510.
- 355 9. Wensing, A.M., et al., *2017 Update of the Drug Resistance Mutations in HIV-1*. *Top*  
356 *Antivir Med*, 2017. **24**(4): p. 132-133.
- 357 10. Tang, M.W. and R.W. Shafer, *HIV-1 antiretroviral resistance: scientific principles and*  
358 *clinical applications*. *Drugs*, 2012. **72**(9): p. e1-25.
- 359 11. Oliveira, M., et al., *Selective resistance profiles emerging in patient-derived clinical*  
360 *isolates with cabotegravir, bictegravir, dolutegravir, and elvitegravir*. *Retrovirology*,  
361 2018. **15**(1): p. 56.
- 362 12. Zhang, W.W., et al., *Accumulation of Multiple Mutations In Vivo Confers Cross-*  
363 *Resistance to New and Existing Integrase Inhibitors*. *J Infect Dis*, 2018. **218**(11): p. 1773-  
364 1776.
- 365 13. Anstett, K., et al., *HIV drug resistance against strand transfer integrase inhibitors.*  
366 *Retrovirology*, 2017. **14**(1): p. 36.
- 367 14. *Stanford University HIV Drug Resistance Database. INSTI resistance notes*. [cited 2018  
368 January 12]; Available from: [https://hivdb.stanford.edu/dr-summary/resistance-](https://hivdb.stanford.edu/dr-summary/resistance-notes/INSTI/)  
369 [notes/INSTI/](https://hivdb.stanford.edu/dr-summary/resistance-notes/INSTI/).
- 370 15. Liu, T.F. and R.W. Shafer, *Web resources for HIV type 1 genotypic-resistance test*  
371 *interpretation*. *Clin Infect Dis*, 2006. **42**(11): p. 1608-18.
- 372 16. Brockman, M.A., et al., *Uncommon pathways of immune escape attenuate HIV-1*  
373 *integrase replication capacity*. *J Virol*, 2012. **86**(12): p. 6913-23.

- 374 17. Woods, C.K., et al., *Automating HIV drug resistance genotyping with RECall, a freely*  
375 *accessible sequence analysis tool.* J Clin Microbiol, 2012. **50**(6): p. 1936-42.
- 376 18. Malet, I., et al., *Mutations Located outside the Integrase Gene Can Confer Resistance to*  
377 *HIV-1 Integrase Strand Transfer Inhibitors.* MBio, 2017. **8**(5).
- 378 19. Kamelian, K., et al., *Prevalence of Human Immunodeficiency Virus-1 Integrase Strand*  
379 *Transfer Inhibitor Resistance in British Columbia, Canada Between 2009 and 2016: A*  
380 *Longitudinal Analysis.* Open Forum Infect Dis, 2019. **6**(3): p. ofz060.
- 381 20. Saladini F, G.A., Boccuto A, Dragoni F, Appendino A, Albanesi E, Vicenti I, Zazzi M, *in*  
382 *vitro activity of DTG/BIC/E/CAB on first-generation INSTI-resistant HIV-1,* in  
383 *Conference of Retroviruses and Opportunistic infections (CROI).* 2019, CROI: Seattle,  
384 USA.
- 385 21. Chloe Orkin, K.A., Miguel Górgolas Hernández-Mora, Vadim Pokrovsky, Edgar T.  
386 Overton, Pierre-Marie Girard, Shinichi Oka, Ronald D'Amico, David Dorey, Sandy  
387 Griffith, David A. Margolis, Peter E. Williams, Wim Parys, William Spreen, *Long-*  
388 *acting cabotegravir + rilpivirine for hiv maintenance: FLAIR week 48 results in*  
389 *Conference on Opportunistic infections and Retroviruses (CROI).* 2019, CROI: Seattle,  
390 Washington.
- 391 22. Susan Swindells, J.-F.A.-V., Gary J. Richmond, Giuliano Rizzardini, Axel Baumgarten,  
392 Maria Del Mar Masia, Gulam Latiff, Vadim Pokrovsky, Joseph M. Mrus, Jenny O.  
393 Huang, Krischan J. Hudson, David A. Margolis, Kimberly Smith, Peter E. Williams,  
394 William Spreen, *Long-acting cabotegravir + rilpivirine as maintenance therapy: ATLAS*  
395 *week 48 results in Conference of Retroviruses and Opportunistic infections (CROI).*  
396 2019, CROI: Seattle, Washington.
- 397 23. Tsiang, M., et al., *Antiviral Activity of Bictegravir (GS-9883), a Novel Potent HIV-1*  
398 *Integrase Strand Transfer Inhibitor with an Improved Resistance Profile.* Antimicrob  
399 Agents Chemother, 2016. **60**(12): p. 7086-7097.
- 400 24. Underwood, M.R., et al., *The activity of the integrase inhibitor dolutegravir against HIV-*  
401 *1 variants isolated from raltegravir-treated adults.* J Acquir Immune Defic Syndr, 2012.  
402 **61**(3): p. 297-301.
- 403 25. Hardy, I., et al., *Evolution of a novel pathway leading to dolutegravir resistance in a*  
404 *patient harbouring N155H and multiclass drug resistance.* J Antimicrob Chemother,  
405 2015. **70**(2): p. 405-11.
- 406 26. Sevin, A.D., et al., *Methods for investigation of the relationship between drug-*  
407 *susceptibility phenotype and human immunodeficiency virus type 1 genotype with*  
408 *applications to AIDS clinical trials group 333.* J Infect Dis, 2000. **182**(1): p. 59-67.
- 409 27. Beerenwinkel, N., et al., *Geno2pheno: Estimating phenotypic drug resistance from HIV-1*  
410 *genotypes.* Nucleic Acids Res, 2003. **31**(13): p. 3850-5.

411

412

413

414

415

416 **FIGURES LEGENDS**

417 **Figure 1.**

418 The number of samples with amino acid substitutions observed at each of the 27 integrase  
419 codons investigated in subtype B (N=115, dark grey) and non-B viruses (N=47, light grey).

420 **Figure 2.**

421 Log-fold change (FC) in DTG (red), BIC (blue), and CAB (green) of subtype B and non-B  
422 viruses with 1, 2, 3, 4, 5, and 6 amino acid substitutions relative to HIV subtype B consensus at  
423 27 integrase codons of interest. The dashed line represents the PhenoSense integrase assay  
424 (Monogram Biosciences, Inc.) biological cutoff of log-transformed 2.5 FC for DTG as reference.

425 **Figure 3.**

426 Log-fold change (FC) of each individual single amino acid substitutions in subtype B and non-B  
427 viruses.

428 **Figure 4.**

429 Correlation between log bicitragravir (BIC), cabotegravir (CAB) and Dolutegravir (DTG) fold  
430 change (FC) values for N=162 viruses. A) Log BIC FC versus Log DTG FC. Correlation (r-  
431 value) was 0.93 and slope was 0.81. B) Log CAB FC versus Log DTG FC. Correlation (r-value)  
432 was 0.87 and slope was 1.1.

433 **Supplemental Figure 1.**

434 HIV-1 integrase map using subtype B consensus sequence as reference. Bolded black amino  
435 acids show 27 codon positions included in this study. Integrase inhibitor (INSTI) resistance  
436 positions and mutations are shown in red. Superscript number shows the frequency of amino  
437 acids observed in this study. Adjacent plain text indicates current Stanford INSTI resistance  
438 scores; no resistance [0] to high resistance [60] for bicitragravir [B], dolutegravir [D], raltegravir

439 [R], and elvitegravir [E]. Blue amino acids represent other variants observed at that particular  
440 codon, followed by its frequency.

441 **Supplemental Figure 2.** Number of variants tested from BCCfE database plotted versus their  
442 cumulative percentage shows that relatively few samples are required to represent much of the *in*  
443 *vivo* variation. Note that more sequence data were added to the existing 12,109 samples (as  
444 presented in Supplemental Table 1) later in the study, which increased the total number to 15,285  
445 samples. The latter number was used to perform coverage analysis presented here.

#### 446 **TABLE LEGENDS**

447 **Supplemental Table 1.** This table lists the number of clinical samples to show known amino  
448 acid permutations (N=288) at 27 codon positions in the BCCfE clinical database.

449 **Supplemental Table 2.** This table lists all the patient-derived HIV-1 integrase recombinant  
450 viruses (N=162) generated along with their complete amino acid sequences.

451 **Supplemental Table 3.** This table lists all the patient-derived HIV-1 integrase recombinant  
452 viruses (N=162) phenotyped, their subtype, the most relevant 27 codons (summarized as “INSTI  
453 mutation pattern” in the last column), and fold change (FC) in the 50% effective concentrations  
454 (EC50) for bictegravir (BIC), cabotegravir (CAB), dolutegravir (DTG), raltegravir (RAL), and  
455 elvitegravir (EVG). n/a denotes no data available.

456

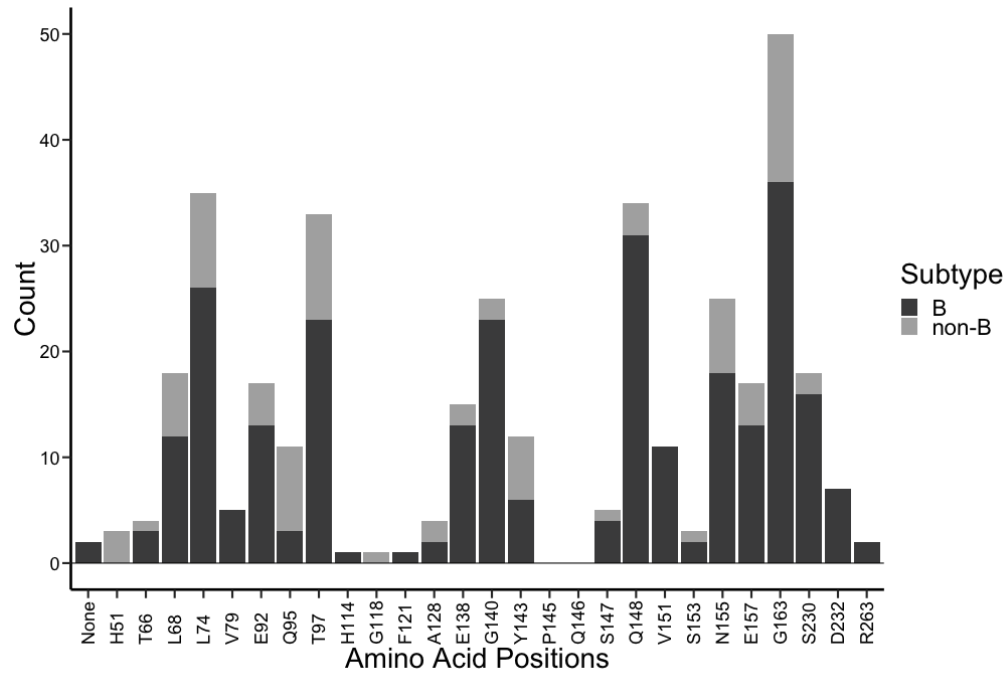

**Figure 1.**

The number of samples with amino acid substitutions observed at each of the 27 integrase codons investigated in subtype B (N=115, dark grey) and non-B viruses (N=47, light grey).

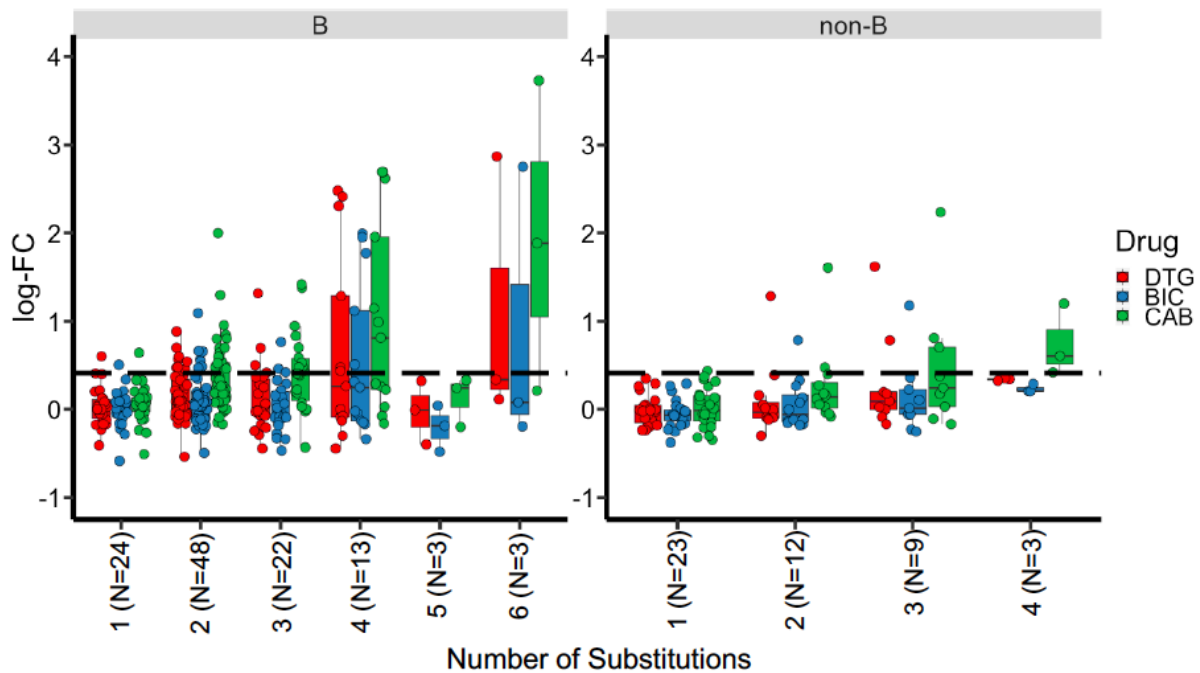

**Figure 2.**

Log-fold change (FC) in DTG (red), BIC (blue), and CAB (green) of subtype B and non-B viruses with 1, 2, 3, 4, 5, and 6 amino acid substitutions relative to HIV subtype B consensus at 27 integrase codons of interest. The dashed line represents the PhenoSense integrase assay (Monogram Biosciences, Inc.) biological cutoff of log-transformed 2.5 FC for DTG as reference.

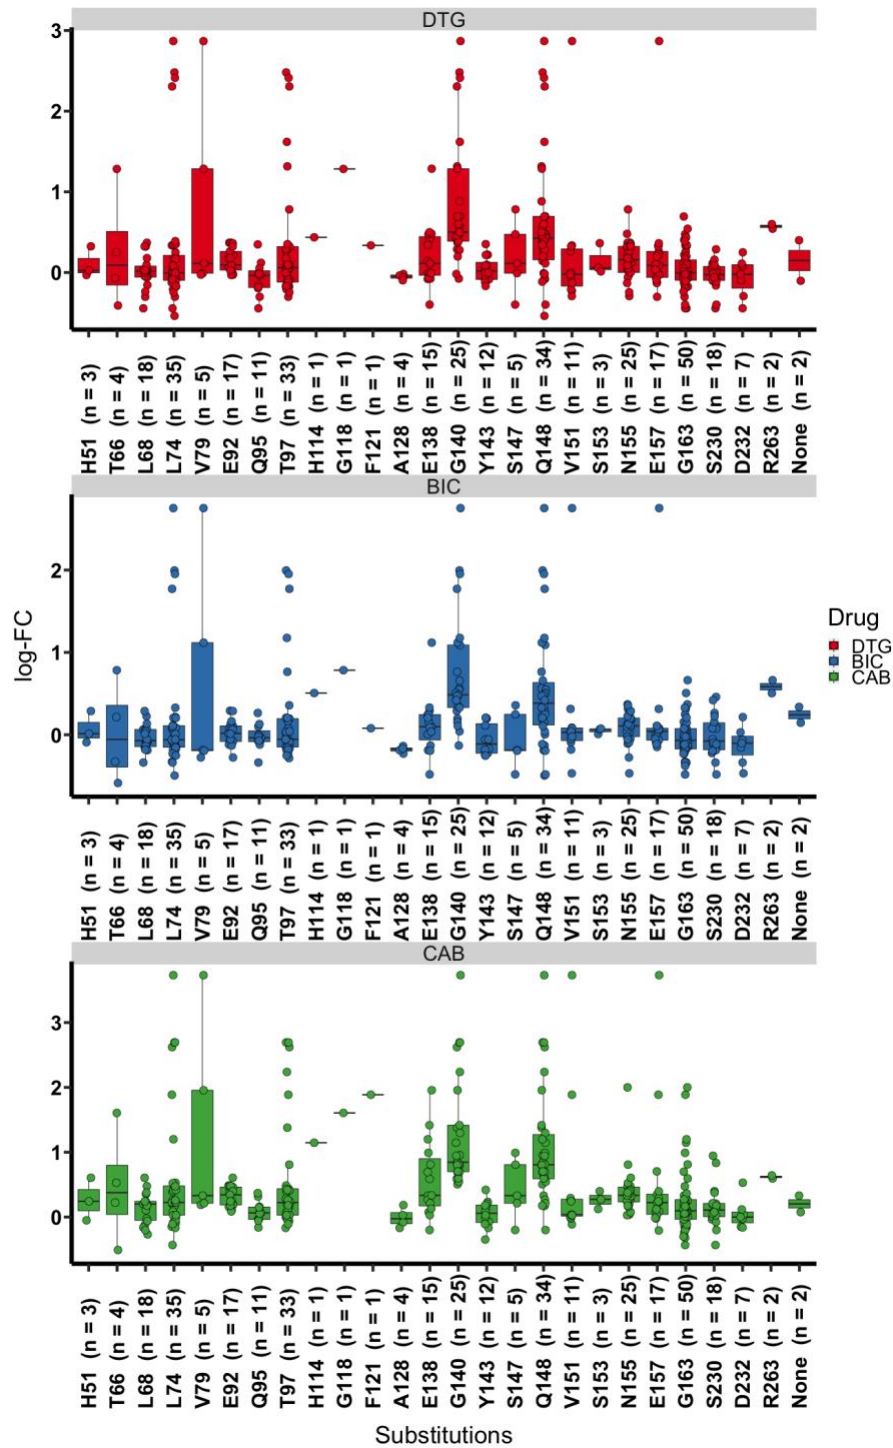

**Figure 3.**

Log fold-change (FC) of each individual single amino acid substitutions in subtype B and non-B viruses.

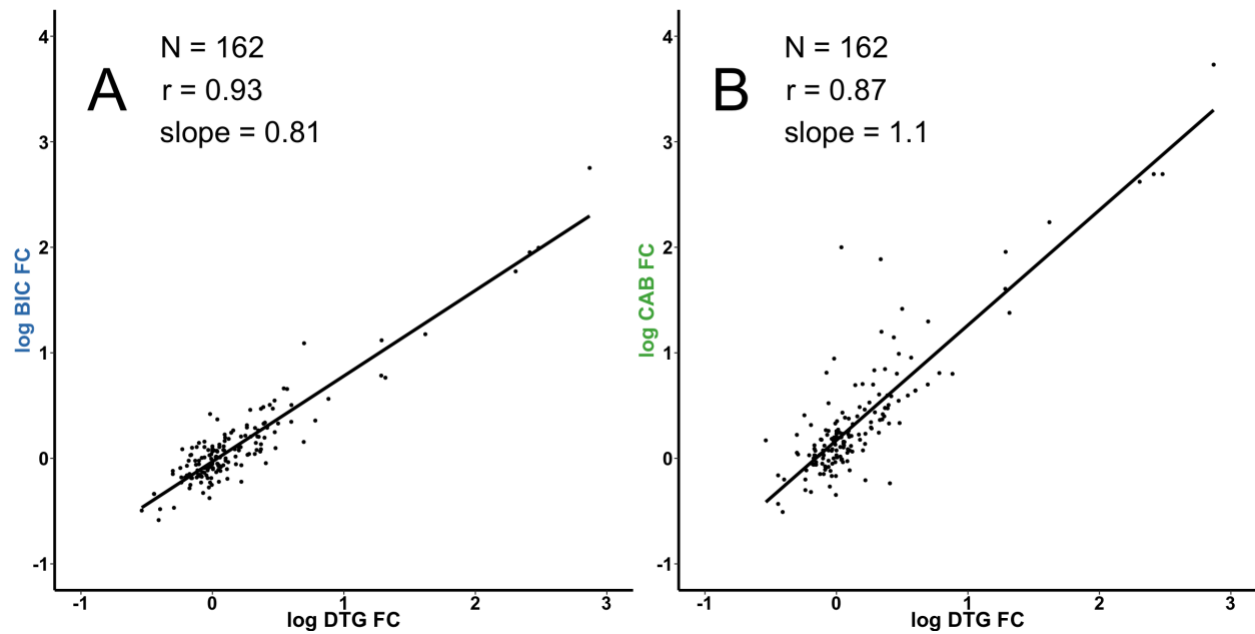

**Figure 4.**

Correlation between log bictegrovir (BIC), cabotegrovir (CAB) and Dolutegrovir (DTG) fold change (FC) values for N=162 viruses. A) Log BIC FC versus Log DTG FC. Correlation (r-value) was 0.93 and slope was 0.81. B) Log CAB FC versus Log DTG FC. Correlation (r-value) was 0.87 and slope was 1.1.



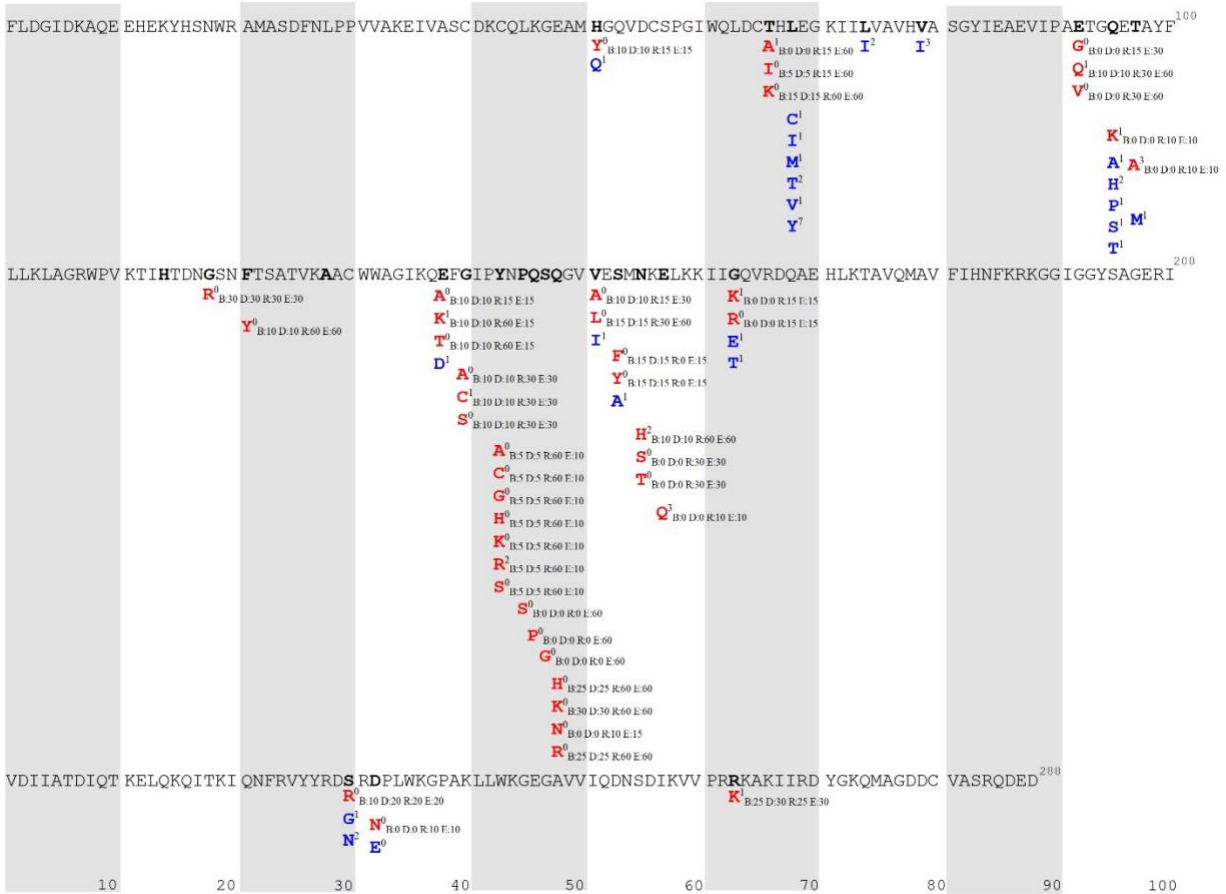

### Supplemental Figure 1.

HIV-1 integrase map using subtype B consensus sequence as reference. Bolded black amino acids show 27 codon positions included in this study. Integrase inhibitor (INSTI) resistance positions and mutations are shown in red. Superscript number shows the frequency of amino acids observed in this study. Adjacent plain text indicates current Stanford INSTI resistance scores; no resistance [0] to high resistance [60] for bictegravir [B], dolutegravir [D], raltegravir [R], and elvitegravir [E]. Blue amino acids represent other variants observed at that particular codon, followed by its frequency.

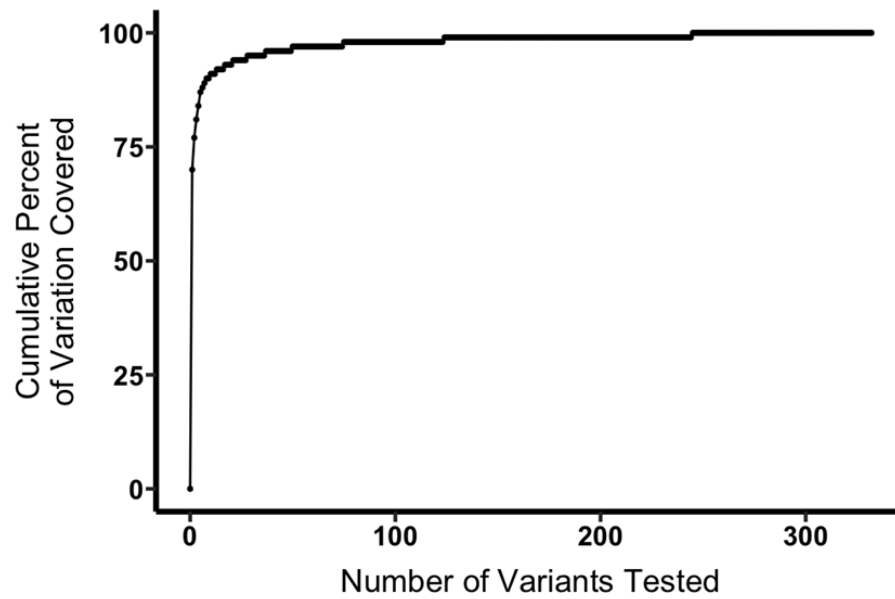

**Supplemental Figure 2.** Number of variants tested from BCCfE database plotted versus their cumulative percentage shows that relatively few samples are required to represent much of the *in vivo* variation. Note that more sequence data were added to the existing 12,109 samples (as presented in Supplemental Table 1) later in the study, which increased the total number to 15,285 samples. The latter number was used to perform coverage analysis presented here.
